# Supplementary material
Source: Springer Nature journal article supplement (https://www.springermedizin.de/resource/supplementary/12885_2011_2966_MOESM4_ESM.pdf/9462392)

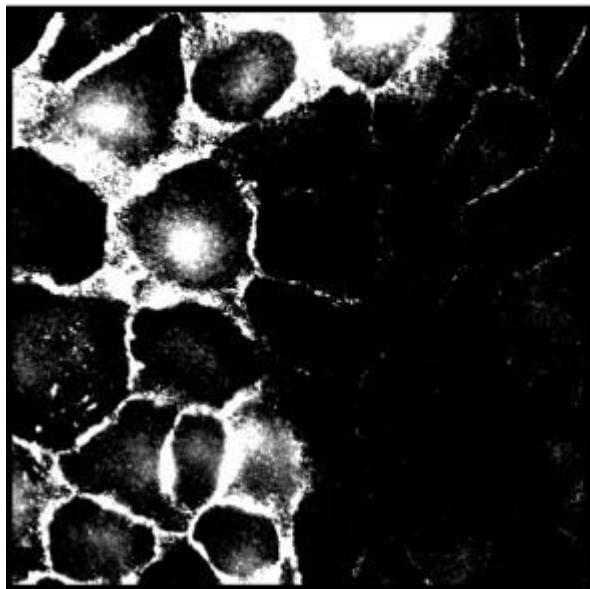

E-Cadherin

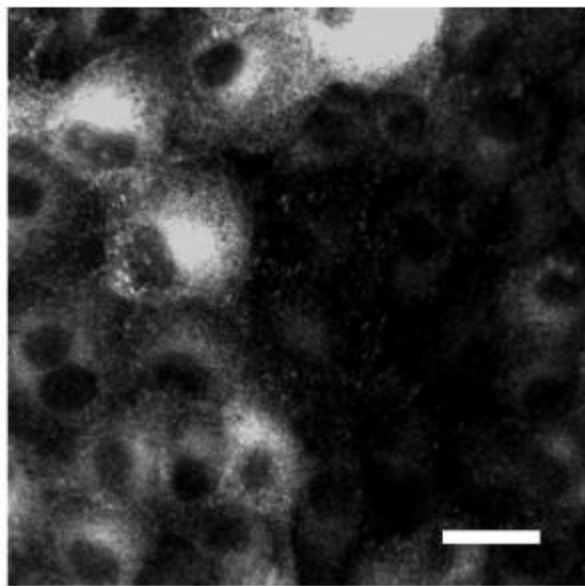

Paxillin

Supplement: MOESM4 [file 9462392]
